# Supplementary material for: Antimicrobial Activity and Chemical Composition of Essential Oils against Pathogenic Microorganisms of Freshwater Fish
Source: MDPI journal article supplement (doi:10.3390/plants10071265), 2021-06-22
Supplement: s1 [file s1]

Supplemental file 1. Chemical composition of essential oils (%) \*.

| Essential Oil                        | Components <sup>a</sup>     | Percentage of Components <sup>b</sup> |
|--------------------------------------|-----------------------------|---------------------------------------|
| <i>Amyris balsamifera</i> L.         | $\alpha$ -gurjunene         | 2.4                                   |
|                                      | (E)-caryophyllene           | 1.3                                   |
|                                      | $\alpha$ -curcumene         | 3.2                                   |
|                                      | $\alpha$ -zingiberene       | 1.9                                   |
|                                      | $\beta$ -dihydro agarofuran | 1.1                                   |
|                                      | $\beta$ -bisabolene         | 1.9                                   |
|                                      | $\beta$ -sesquiphellandrene | 2.7                                   |
|                                      | selina-3,7(11)-diene        | 1.5                                   |
|                                      | elemol                      | 11.5                                  |
|                                      | $\tau$ -cadinol             | 33.4                                  |
|                                      | $\beta$ -eudesmol           | 1.9                                   |
|                                      | $\alpha$ -eudesmol          | 9.6                                   |
|                                      | $\alpha$ -cadinol           | 1.3                                   |
|                                      | 7-epi- $\alpha$ -eudesmol   | 7.7                                   |
|                                      | selin-11-en-4- $\alpha$ -ol | 11.3                                  |
| <i>Boswellia carterii</i> L.         | drimenol                    | 2.6                                   |
|                                      | $\alpha$ -thujene           | 4.2                                   |
|                                      | $\alpha$ -pinene            | 37.0                                  |
|                                      | camphene                    | 1.3                                   |
|                                      | sabinene                    | 4.1                                   |
|                                      | $\beta$ -pinene             | 1.9                                   |
|                                      | $\beta$ -myrcene            | 2.6                                   |
|                                      | <i>p</i> -cimene            | 6.3                                   |
|                                      | $\alpha$ -limonene          | 19.8                                  |
|                                      | trans-pinocarveol           | 1.0                                   |
|                                      | bornyl acetate              | 1.0                                   |
|                                      | $\beta$ -elemene            | 2.2                                   |
|                                      | (E)-caryophyllene           | 2.5                                   |
|                                      | $\alpha$ -amorphene         | 1.1                                   |
|                                      | $\beta$ -selinene           | 1.5                                   |
| <i>Canarium luzonicum</i><br>Miq.(H) | caryophyllene oxide         | 1.6                                   |
|                                      | sabinene                    | 5.1                                   |
|                                      | $\alpha$ -phellandrene      | 12.6                                  |
|                                      | <i>p</i> -cimene            | 4.9                                   |
|                                      | $\alpha$ -limonene          | 39.7                                  |
|                                      | $\alpha$ -terpinolene       | 1.2                                   |
|                                      | 4-terpinenol                | 1.2                                   |
|                                      | $\alpha$ -terpineol         | 3.7                                   |
|                                      | elemol                      | 20.8                                  |
|                                      | $\gamma$ -eudesmol          | 1.3                                   |
|                                      | $\alpha$ -eudesmol          | 1.5                                   |

## Supplemental file 1. Cont.

| Essential Oil                     | Components <sup>a</sup>     | Percentage of Components <sup>b</sup> |
|-----------------------------------|-----------------------------|---------------------------------------|
| <i>Amyris balsamifera</i> L.      | $\alpha$ -gurjunene         | 2.4                                   |
|                                   | ( <i>E</i> )-caryophyllene  | 1.3                                   |
|                                   | $\alpha$ -curcumene         | 3.2                                   |
|                                   | $\alpha$ -zingiberene       | 1.9                                   |
|                                   | $\beta$ -dihydro agarofuran | 1.1                                   |
|                                   | $\beta$ -bisabolene         | 1.9                                   |
|                                   | $\beta$ -sesquiphellandrene | 2.7                                   |
|                                   | selina-3,7(11)-diene        | 1.5                                   |
|                                   | elemol                      | 11.5                                  |
|                                   | $\tau$ -cadinol             | 33.4                                  |
|                                   | $\beta$ -eudesmol           | 1.9                                   |
|                                   | $\alpha$ -eudesmol          | 9.6                                   |
|                                   | $\alpha$ -cadinol           | 1.3                                   |
|                                   | 7-epi- $\alpha$ -eudesmol   | 7.7                                   |
|                                   | selin-11-en-4- $\alpha$ -ol | 11.3                                  |
| <i>Boswellia carterii</i> L.      | drimenol                    | 2.6                                   |
|                                   | $\alpha$ -thujene           | 4.2                                   |
|                                   | $\alpha$ -pinene            | 37.0                                  |
|                                   | camphene                    | 1.3                                   |
|                                   | sabinene                    | 4.1                                   |
|                                   | $\beta$ -pinene             | 1.9                                   |
|                                   | $\beta$ -myrcene            | 2.6                                   |
|                                   | <i>p</i> -cimene            | 6.3                                   |
|                                   | $\alpha$ -limonene          | 19.8                                  |
|                                   | trans-pinocarveol           | 1.0                                   |
|                                   | bornyl acetate              | 1.0                                   |
|                                   | $\beta$ -elemene            | 2.2                                   |
|                                   | ( <i>E</i> )-caryophyllene  | 2.5                                   |
|                                   | $\alpha$ -amorphene         | 1.1                                   |
|                                   | $\beta$ -selinene           | 1.5                                   |
| <i>Canarium luzonicum</i> Miq.(H) | caryophyllene oxide         | 1.6                                   |
|                                   | sabinene                    | 5.1                                   |
|                                   | $\alpha$ -phellandrene      | 12.6                                  |
|                                   | <i>p</i> -cimene            | 4.9                                   |
|                                   | $\alpha$ -limonene          | 39.7                                  |
|                                   | $\alpha$ -terpinolene       | 1.2                                   |
|                                   | 4-terpinenol                | 1.2                                   |
|                                   | $\alpha$ -terpineol         | 3.7                                   |
|                                   | elemol                      | 20.8                                  |
|                                   | $\gamma$ -eudesmol          | 1.3                                   |
|                                   | $\alpha$ -eudesmol          | 1.5                                   |

Table 1. Cont.

| Essential Oil                                       | Components <sup>a</sup>        | Percentage of Components <sup>b</sup> |
|-----------------------------------------------------|--------------------------------|---------------------------------------|
| <i>Cinnamomum camphora</i> Nees & Eberm             | $\alpha$ -thujene              | 2.3                                   |
|                                                     | $\alpha$ -pinene               | 12.2                                  |
|                                                     | camphene                       | 1.4                                   |
|                                                     | sabinene                       | 5.6                                   |
|                                                     | $\beta$ -pinene                | 2.9                                   |
|                                                     | $\beta$ -myrcene               | 1.2                                   |
|                                                     | <i>o</i> -cimene               | 12.1                                  |
|                                                     | $\alpha$ -limonene             | 25.1                                  |
|                                                     | 1,8-cineole                    | 35.2                                  |
| <i>Cinnamomum camphora</i> var. <i>linalolifera</i> | linalool                       | 98.1                                  |
| <i>Citrus aurantium</i> L.                          | $\alpha$ -pinene               | 1.1                                   |
|                                                     | $\beta$ -myrcene               | 1.0                                   |
|                                                     | $\alpha$ -limonene             | 1.2                                   |
|                                                     | 1,8-cineole                    | 5.0                                   |
|                                                     | ( <i>E</i> )- $\beta$ -ocimene | 1.3                                   |
|                                                     | linalool                       | 22.8                                  |
|                                                     | $\alpha$ -terpineol            | 6.6                                   |
|                                                     | nerol                          | 1.2                                   |
|                                                     | linalool acetate               | 48.5                                  |
|                                                     | neryl acetate                  | 2.7                                   |
|                                                     | geranyl acetate                | 4.6                                   |
| <i>Gaultheria procumbens</i> L.                     | methyl salicylate              | 97.6                                  |
| <i>Litsea cubeba</i> Pers.                          | $\alpha$ -pinene               | 1.7                                   |
|                                                     | sabinene                       | 1.9                                   |
|                                                     | $\beta$ -pinene                | 2.3                                   |
|                                                     | 6-methyl-5-hepten-2-one        | 1.3                                   |
|                                                     | $\alpha$ -limonene             | 14.3                                  |
|                                                     | 1,8-cineole                    | 1.9                                   |
|                                                     | $\alpha$ -terpinolene          | 1.6                                   |
|                                                     | neral                          | 29.5                                  |
|                                                     | geranial                       | 39.4                                  |
| <i>Melaleuca leucadendron</i> L.                    | $\alpha$ -thujene              | 5.6                                   |
|                                                     | $\alpha$ -pinene               | 5.4                                   |
|                                                     | $\beta$ -pinene                | 2.1                                   |
|                                                     | <i>p</i> -cimene               | 3.3                                   |
|                                                     | $\alpha$ -limonene             | 6.9                                   |
|                                                     | 1,8-cineole                    | 49.0                                  |
|                                                     | $\gamma$ -terpinene            | 2.4                                   |
|                                                     | $\alpha$ -terpinolene          | 1.0                                   |
|                                                     | $\alpha$ -terpineol            | 7.8                                   |
|                                                     | $\alpha$ -terpinyl acetate     | 1.3                                   |
|                                                     | ( <i>E</i> )-caryophyllene     | 4.3                                   |
|                                                     | $\beta$ -selinene              | 1.8                                   |
|                                                     | $\alpha$ -selinene             | 1.2                                   |

Table 1. Cont.

| Essential Oil                      | Components <sup>a</sup>                       | Percentage of Components <sup>b</sup> |
|------------------------------------|-----------------------------------------------|---------------------------------------|
| <i>Melaleuca ericifolia</i> Smith. | $\alpha$ -pinene                              | 1.0                                   |
|                                    | <i>o</i> -cymene                              | 1.3                                   |
|                                    | $\alpha$ -limonene                            | 1.3                                   |
|                                    | 1,8-cineole                                   | 16.9                                  |
|                                    | g-terpinene                                   | 1.5                                   |
|                                    | cis-linalool oxide                            | 1.2                                   |
|                                    | trans-linalool oxide                          | 1.4                                   |
|                                    | linalool                                      | 47.5                                  |
|                                    | camphor                                       | 1.3                                   |
|                                    | 4-terpinenol                                  | 2.9                                   |
|                                    | $\alpha$ -terpineol                           | 5.0                                   |
|                                    | aromadendrene                                 | 5.3                                   |
|                                    | ledene                                        | 1.5                                   |
| <i>Pogostemon cabli</i> L.         | caryophyllene oxide                           | 1.2                                   |
|                                    | $\beta$ -patchoulene                          | 3.0                                   |
|                                    | $\beta$ -elemene                              | 2.2                                   |
|                                    | ( <i>E</i> )-caryophyllene                    | 3.4                                   |
|                                    | $\alpha$ -guaiene                             | 14.3                                  |
|                                    | seychellene                                   | 6.9                                   |
|                                    | $\alpha$ -patchoulene                         | 6.8                                   |
|                                    | $\beta$ -selinene                             | 2.2                                   |
|                                    | $\alpha$ -selinene                            | 3.3                                   |
|                                    | $\alpha$ -bulnesene                           | 21.3                                  |
|                                    | caryophyllene oxide                           | 1.1                                   |
|                                    | 5-epi-7-epi- $\alpha$ -eudesmol               | 1.1                                   |
|                                    | patchouli alcohol                             | 31.0                                  |
| <i>Citrus limon</i> (L.)           | $\alpha$ -pinene                              | 2.6                                   |
|                                    | sabinene                                      | 2.8                                   |
|                                    | $\beta$ -pinene                               | 13.3                                  |
|                                    | $\beta$ -myrcene                              | 2.0                                   |
|                                    | <i>p</i> -cimene                              | 1.0                                   |
|                                    | $\alpha$ -limonene                            | 58.9                                  |
|                                    | $\gamma$ -terpinene                           | 11.2                                  |
|                                    | neral                                         | 1.1                                   |
| <i>Santalum album</i> L.           | geranial                                      | 1.8                                   |
|                                    | $\alpha$ -santalene                           | 5.03                                  |
|                                    | $\alpha$ -bergamotene                         | 9.68                                  |
|                                    | $\alpha$ -santalal                            | 2.54                                  |
|                                    | $\alpha$ -santalol                            | 59.0                                  |
|                                    | $\beta$ -santalol                             | 9.02                                  |
|                                    | Lanceol                                       | 1.93                                  |
|                                    | ( <i>E</i> )-nuciferol                        | 1.74                                  |
|                                    | 7-(5-hexynyl)-tricyclo[4.2.2.0(2,5)]dec-7-ene | 1.38                                  |

Table 1. *Cont.*

| Essential Oil                    | Components <sup>a</sup>                               | Percentage of Components <sup>b</sup> |
|----------------------------------|-------------------------------------------------------|---------------------------------------|
| <i>Vetiveria zizanoides</i> (L.) | 3,3,5,6,8,8-Hexamethyltricyclo[5.1.0.0(2,4)]oct-5-ene | 1.02                                  |
|                                  | Tricyclo[6.3.0.0(1,5)]undec-2-en-4-one, 5,9-dimethyl  | 2.00                                  |
|                                  | 1,2,4,5-tetraethylbenzene                             | 4.39                                  |
|                                  | $\alpha$ -muurolene                                   | 1.89                                  |
|                                  | $\alpha$ -cadinene                                    | 1.74                                  |
|                                  | Selina-5,11-diene                                     | 1.50                                  |
|                                  | $\delta$ -cadinene                                    | 1.57                                  |
|                                  | $\alpha$ -vetispirene                                 | 1.77                                  |
|                                  | $\beta$ -vetispirene                                  | 2.03                                  |
|                                  | $\gamma$ -vetivenene                                  | 3.30                                  |
|                                  | $\beta$ -vetivenene                                   | 7.42                                  |
|                                  | Valencen                                              | 2.19                                  |
|                                  | 3,5,11-Eudesmatriene                                  | 1.65                                  |
|                                  | 7,7-dichlorobicyclo[3.2.0]hept-2-en-6-one             | 1.22                                  |
|                                  | $\gamma$ -himachalene                                 | 2.63                                  |
|                                  | Ziza-6(13)-en-12-al                                   | 1.02                                  |
|                                  | Khusiol                                               | 1.12                                  |
|                                  | $\beta$ -guaiene                                      | 4.43                                  |
|                                  | Cyclocopacamphenol                                    | 1.66                                  |
|                                  | Zizanol                                               | 1.03                                  |
|                                  | (E)-isovalencenal                                     | 1.37                                  |
|                                  | Vetiselinenol                                         | 1.41                                  |
|                                  | Vetiverol                                             | 2.22                                  |
|                                  | Khusenol                                              | 5.24                                  |
|                                  | Vetiverone                                            | 3.02                                  |
|                                  | $\beta$ -costol                                       | 3.52                                  |
|                                  | Khusenic acid                                         | 4.17                                  |

Note: \* listed are the components that represented min. 1%, <sup>a</sup> Identified compounds, <sup>b</sup> compounds identified in amounts.
